# Supplementary material
Source: publisher site journal article supplement (https://www.dovepress.com/article/250404)

**Supplementary Figure 1** **Detection of methylation sites in MDA-MB-231 and BT474 cells through pyrosequencing. (A)** MSP analysis of cg21899596 (HOPX promoter region) methylation in MCF-10A cells, and MDA-MB-231 and BT474 cells. **(B)** MSP analysis of cg24862548 (HOPX promoter region) methylation in MCF-10A cells, and MDA-MB-231 and BT474 cells.


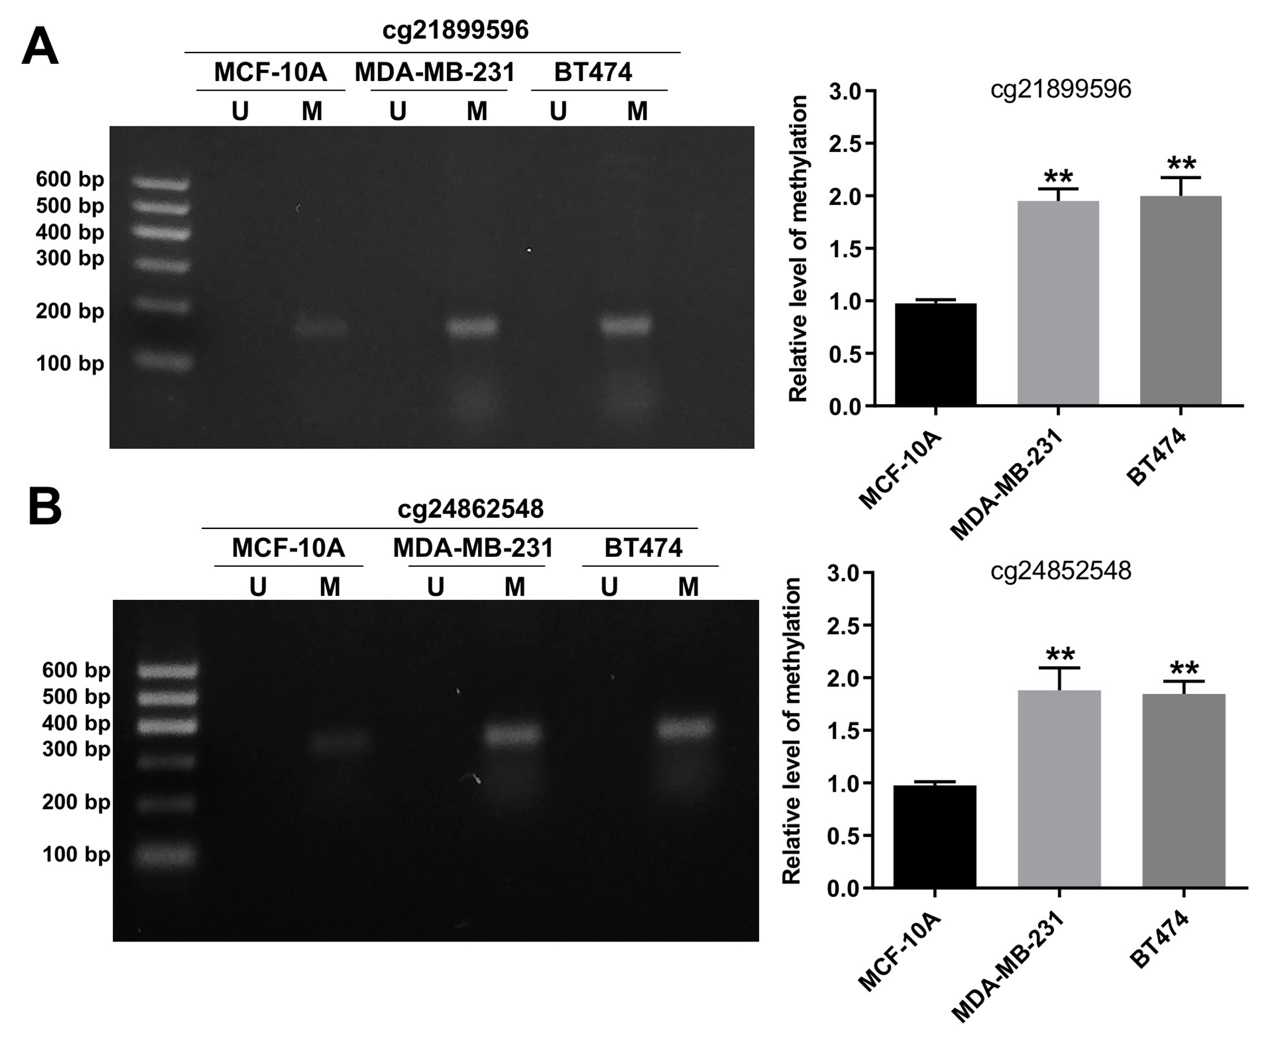

Supplement: Supplementary file 1 [file get_supplementary_file.php]
